# Supplementary material for: RIG-I activating immunostimulatory RNA boosts the efficacy of anticancer vaccines and synergizes with immune checkpoint blockade
Source: PubMed Central journal article supplement — eBioMedicine. 2019 Mar 6;41:146–55. doi: 10.1016/j.ebiom.2019.02.056 (PMC6444128; doi:10.1016/j.ebiom.2019.02.056), 2019-03-06
Supplement: mmc1.pdf [file mmc1.pdf]

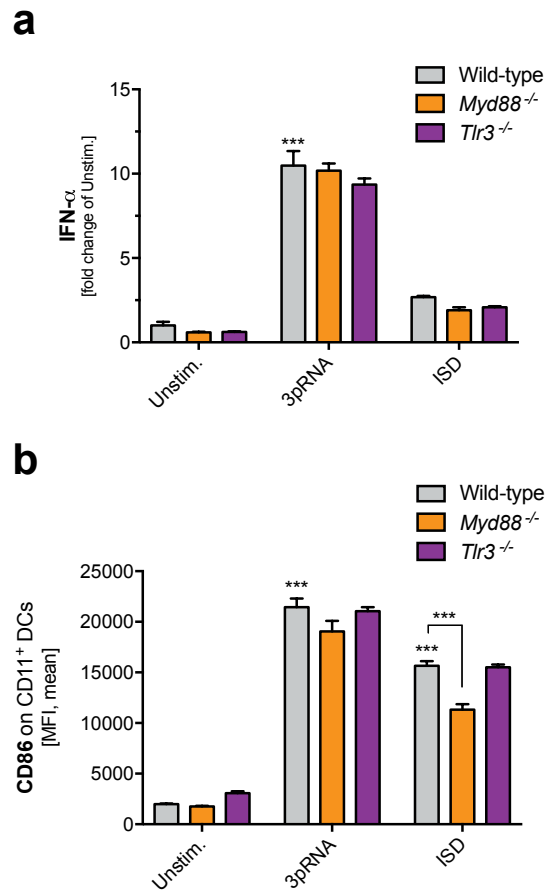

**Figure S1:** Bone marrow-derived dendritic cells (BMDCs) from wild-type (WT), MyD88 (*Myd88*<sup>-/-</sup>) and TLR3-deficient (*Tlr3*<sup>-/-</sup>) mice were transfected with 3pRNA or interferon stimulatory DNA (ISD). **(a)** Levels of IFN- $\alpha$  in culture supernatants were determined by ELISA. **(b)** CD86 expression on BMDCs was analyzed by flow cytometry. All data give mean  $\pm$  S.E.M. of triplicate samples that are representative of two independent experiments. An asterisk without brackets indicates comparison to the WT unstimulated control group (\*\*\*  $P < 0.001$ , one-way analysis of variance (ANOVA) for multiple comparisons). MFI, mean fluorescence intensity. Unstim, unstimulated.
