# Supplementary material for: RIG-I activating immunostimulatory RNA boosts the efficacy of anticancer vaccines and synergizes with immune checkpoint blockade
Source: PubMed Central journal article supplement — eBioMedicine. 2019 Mar 6;41:146–55. doi: 10.1016/j.ebiom.2019.02.056 (PMC6444128; doi:10.1016/j.ebiom.2019.02.056), 2019-03-06
Supplement: mmc2.pdf [file mmc2.pdf]

**a**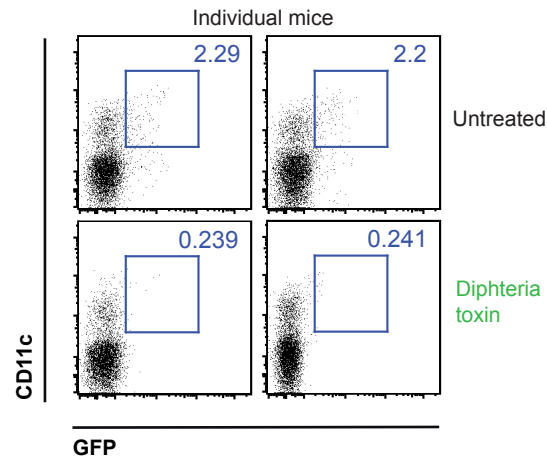**b**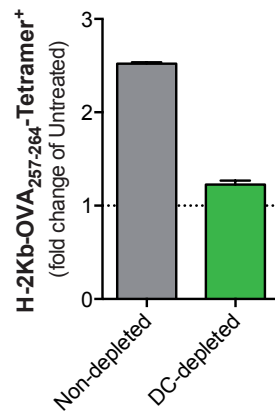**c**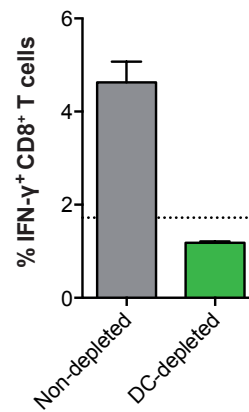

**Figure S2:** CD11c-DTR/GFP mice were treated ip with diphtheria toxin to deplete dendritic cells (DCs) and were subsequently vaccinated with OVA + 3pRNA as described for Figure 3. **(a)** Flow cytometric analysis of spleen cells shows the frequency of GFP<sup>+</sup> DTR-transgenic DCs in individual mice +/- application of diphtheria toxin. **(b)** Expansion of H-2Kb-SIINFEKL Tetramer<sup>+</sup> cytotoxic T cells in draining LN. **(c)** Triplicate samples of the frequency of IFN-γ<sup>+</sup> cytotoxic T cells in *ex vivo* restimulated, complete LN cells from these animals. Data is expressed as fold change against untreated wild-type mice (marked as dotted line). Data give the mean of n = 2 individual mice ± S.E.M.
